# Supplementary material for: Application of Gene Network Analysis Techniques Identifies AXIN1/PDIA2 and Endoglin Haplotypes Associated with Bicuspid Aortic Valve
Source: PubMed Central journal article supplement (PMC2809109; doi:10.1371/journal.pone.0008830), 2010-01-21
Supplement: pone.0008830.s001.pdf [file pone.0008830.s001.pdf]

| GO Class ID | Definitions                                                    | Counts | Fraction |
|-------------|----------------------------------------------------------------|--------|----------|
| GO:0008150  | biological process                                             | 357    | 35.45%   |
| GO:0007275  | development                                                    | 74     | 7.35%    |
| GO:0008152  | metabolism                                                     | 73     | 7.25%    |
| GO:0007154  | cell communication                                             | 50     | 4.97%    |
| GO:0007165  | signal transduction                                            | 44     | 4.37%    |
| GO:0030154  | cell differentiation                                           | 43     | 4.27%    |
| GO:0019538  | protein metabolism                                             | 35     | 3.48%    |
| GO:0009653  | morphogenesis                                                  | 32     | 3.18%    |
| GO:0016043  | cell organization and biogenesis                               | 31     | 3.08%    |
| GO:0006810  | transport                                                      | 22     | 2.18%    |
| GO:0009790  | embryonic development                                          | 21     | 2.09%    |
| GO:0008219  | cell death                                                     | 18     | 1.79%    |
| GO:0016265  | death                                                          | 18     | 1.79%    |
| GO:0006139  | nucleobase, nucleoside, nucleotide and nucleic acid metabolism | 16     | 1.59%    |
| GO:0009058  | biosynthesis                                                   | 15     | 1.49%    |
| GO:0006464  | protein modification                                           | 13     | 1.29%    |
| GO:0006950  | response to stress                                             | 13     | 1.29%    |
| GO:0008283  | cell proliferation                                             | 13     | 1.29%    |
| GO:0009605  | response to external stimulus                                  | 13     | 1.29%    |
| GO:0006350  | transcription                                                  | 11     | 1.09%    |
| GO:0000003  | reproduction                                                   | 9      | 0.89%    |
| GO:0006519  | amino acid and derivative metabolism                           | 7      | 0.70%    |
| GO:0006412  | protein biosynthesis                                           | 6      | 0.60%    |
| GO:0006629  | lipid metabolism                                               | 6      | 0.60%    |
| GO:0015031  | protein transport                                              | 6      | 0.60%    |
| GO:0019725  | cell homeostasis                                               | 6      | 0.60%    |
| GO:0006996  | organelle organization and biogenesis                          | 5      | 0.50%    |
| GO:0007267  | cell-cell signaling                                            | 5      | 0.50%    |
| GO:0009056  | catabolism                                                     | 5      | 0.50%    |
| GO:0009607  | response to biotic stimulus                                    | 5      | 0.50%    |
| GO:0016032  | viral life cycle                                               | 5      | 0.50%    |
| GO:0005975  | carbohydrate metabolism                                        | 4      | 0.40%    |
| GO:0006811  | ion transport                                                  | 4      | 0.40%    |
| GO:0007610  | behavior                                                       | 4      | 0.40%    |
| GO:0007005  | mitochondrion organization and biogenesis                      | 3      | 0.30%    |
| GO:0009628  | response to abiotic stimulus                                   | 3      | 0.30%    |
| GO:0040007  | growth                                                         | 3      | 0.30%    |
| GO:0006259  | DNA metabolism                                                 | 2      | 0.20%    |
| GO:0007049  | cell cycle                                                     | 2      | 0.20%    |
| GO:0006091  | generation of precursor metabolites and energy                 | 1      | 0.10%    |
| GO:0007028  | cytoplasm organization and biogenesis                          | 1      | 0.10%    |
| GO:0008037  | cell recognition                                               | 1      | 0.10%    |
| GO:0009719  | response to endogenous stimulus                                | 1      | 0.10%    |
| GO:0016049  | cell growth                                                    | 1      | 0.10%    |
