# Supplementary material for: Application of Gene Network Analysis Techniques Identifies AXIN1/PDIA2 and Endoglin Haplotypes Associated with Bicuspid Aortic Valve
Source: PubMed Central journal article supplement (PMC2809109; doi:10.1371/journal.pone.0008830), 2010-01-21
Supplement: pone.0008830.s002.pdf [file pone.0008830.s002.pdf]

| chr | bp       | rs        | PS  | A1 | A2 | Freq P |
|-----|----------|-----------|-----|----|----|--------|
| 6   | 31701455 | rs2260000 | --- | C  | T  | 0.448  |
| 6   | 31705732 | rs2242660 | --- | T  | C  | 0.345  |
| 6   | 31709822 | rs3115663 | --- | G  | A  | 0.141  |
| 6   | 31710946 | rs1046089 | R/H | A  | G  | 0.278  |
| 6   | 31711570 | rs2261033 | --- | T  | C  | 0.457  |
| 6   | 31711749 | rs9267522 | --- | G  | A  | 0.141  |
| 6   | 31712023 | rs3132453 | --- | A  | C  | 0.0356 |

| Haplotype |          |          |          |          |          |          | FREQ A         | FREQ U         | OR(A)                      | OR(U)    | $\chi^2$     | p-Value         |
|-----------|----------|----------|----------|----------|----------|----------|----------------|----------------|----------------------------|----------|--------------|-----------------|
| C         | C        | A        | G        | C        | A        | C        | 0.2973         | 0.3886         | (-ref-)                    | (-ref-)  | 3.791        | 0.05154         |
| T         | C        | A        | G        | T        | A        | C        | 0.1535         | 0.1714         | 1.079 (0.603; 1.93 )       |          | 0.2434       | 0.6218          |
| <b>T</b>  | <b>T</b> | <b>G</b> | <b>A</b> | <b>T</b> | <b>G</b> | <b>C</b> | <b>0.2261</b>  | <b>0.1344</b>  | <b>2.192 (1.28; 3.76 )</b> | <b> </b> | <b>7.496</b> | <b>0.006184</b> |
| T         | T        | A        | A        | C        | A        | C        | 0.09872        | 0.09219        | 1.285 (0.63; 2.62 )        |          | 0.05462      | 0.8152          |
| <b>T</b>  | <b>C</b> | <b>A</b> | <b>G</b> | <b>T</b> | <b>A</b> | <b>A</b> | <b>0.06957</b> | <b>0.03344</b> | <b>2.555 (1.11; 5.86 )</b> | <b> </b> | <b>4.064</b> | <b>0.0438</b>   |
| T         | T        | A        | G        | C        | A        | C        | 0.02797        | 0.07116        | 0.5033 (0.157; 1.61 )      |          | 3.15         | 0.07595         |
| C         | C        | A        | G        | T        | A        | C        | 0.07771        | 0.06547        | 1.526 (0.683; 3.41 )       |          | 0.2605       | 0.6098          |
| T         | T        | A        | A        | T        | A        | C        | 0.0491         | 0.04339        | 1.492 (0.564; 3.95 )       |          | 0.08396      | 0.772           |
