# Supplementary material for: Application of Gene Network Analysis Techniques Identifies AXIN1/PDIA2 and Endoglin Haplotypes Associated with Bicuspid Aortic Valve
Source: PubMed Central journal article supplement (PMC2809109; doi:10.1371/journal.pone.0008830), 2010-01-21
Supplement: pone.0008830.s003.pdf [file pone.0008830.s003.pdf]

| SNP       | CHR | BP       | UNADJ    | fitSNP BONF    | CANDID BONF      | STRING BONF    | RF BONF        | FDR       |
|-----------|-----|----------|----------|----------------|------------------|----------------|----------------|-----------|
| rs388647  | 3   | 21475627 | 5.06E-06 | NP             | NP               | NP             | <b>0.03201</b> | 0.02099   |
| rs942379  | 6   | 25957598 | 4.02E-06 | <b>0.02937</b> | NP               | NP             | NP             | 0.01468   |
| rs2596501 | 6   | 31429189 | 1.68E-06 | NP             | NP               | <b>0.01475</b> | NP             | 0.0147    |
| rs9930956 | 16  | 2025295  | 5.50E-08 | NP             | <b>0.0006906</b> | NP             | NP             | 0.0006906 |
| rs2290902 | 16  | 87310176 | 3.27E-06 | <b>0.02391</b> | NP               | NP             | NP             | 0.01468   |

**Supplemental Table 3:** Lowest observed significant corrected p-Values by prioritization category. Lowest corrected p-Value observed at SNP is bolded; NP= Not Present in group.
